# Supplementary material for: Effect of chemical structure on the subglass relaxation dynamics of biobased polyesters as revealed by dielectric spectroscopy: 2,5-furandicarboxylic acid vs. trans-1,4-cyclohexanedicarboxylic acid
Source: Royal Society of Chemistry journal article supplement (doi:10.1039/c8cp01810c), 2018-01-01
Supplement: c8cp01810c1.pdf [file c8cp01810c1.pdf]

# Supporting Information

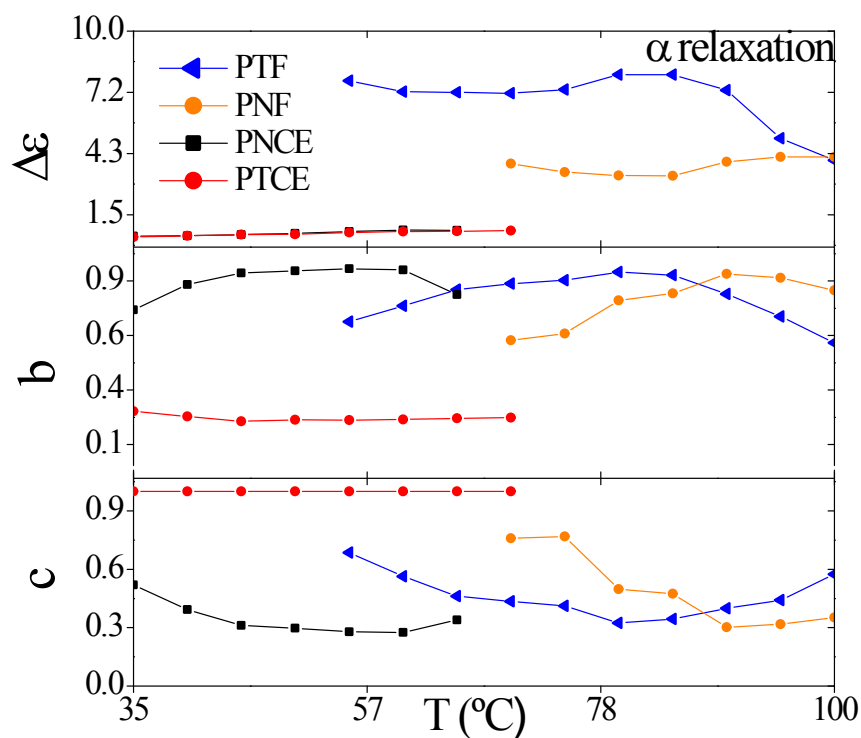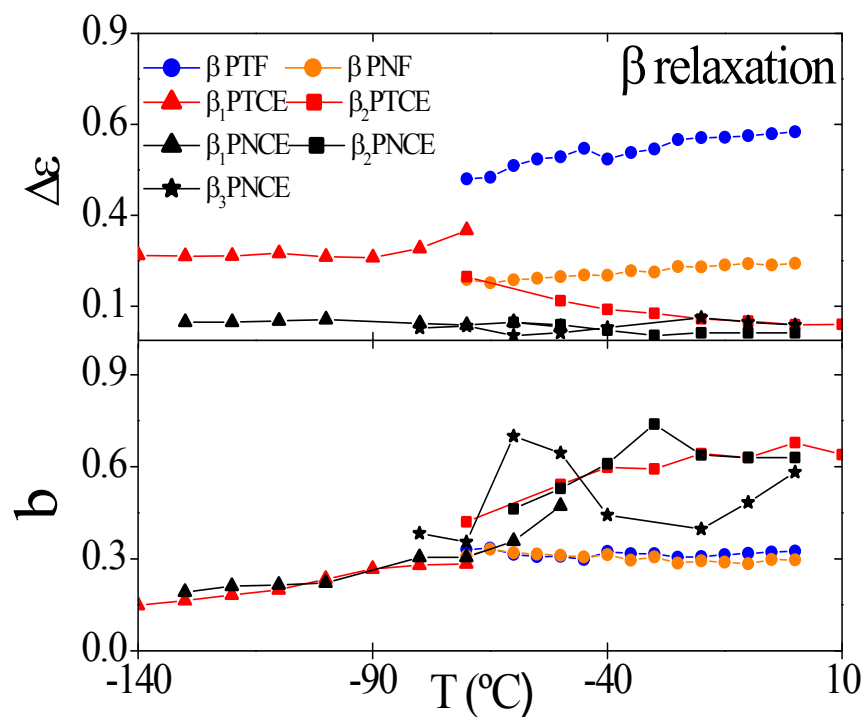

### Figure S1

Temperature dependence of dielectric functions parameters of  $\alpha$  and  $\beta$  relaxation processes for PTF (blue), PNF (orange), PTCE (red) and PNCE (black): Relaxation strength ( $\Delta\epsilon$ ), symmetric (b) and asymmetric (c) broadening.
